# Supplementary material for: Musashi-1 regulates AKT-derived IL-6 autocrinal/paracrinal malignancy and chemoresistance in glioblastoma
Source: Oncotarget. 2016 Jun 7;7(27):42485–501. doi: 10.18632/oncotarget.9890 (PMC5173150; doi:10.18632/oncotarget.9890)
Supplement: Supplementary file 1 [file oncotarget-07-42485-s001.pdf]

# Musashi-1 regulates AKT-derived IL-6 autocrinal/paracrine malignancy and chemoresistance in glioblastoma

## SUPPLEMENTARY FIGURES AND TABLE

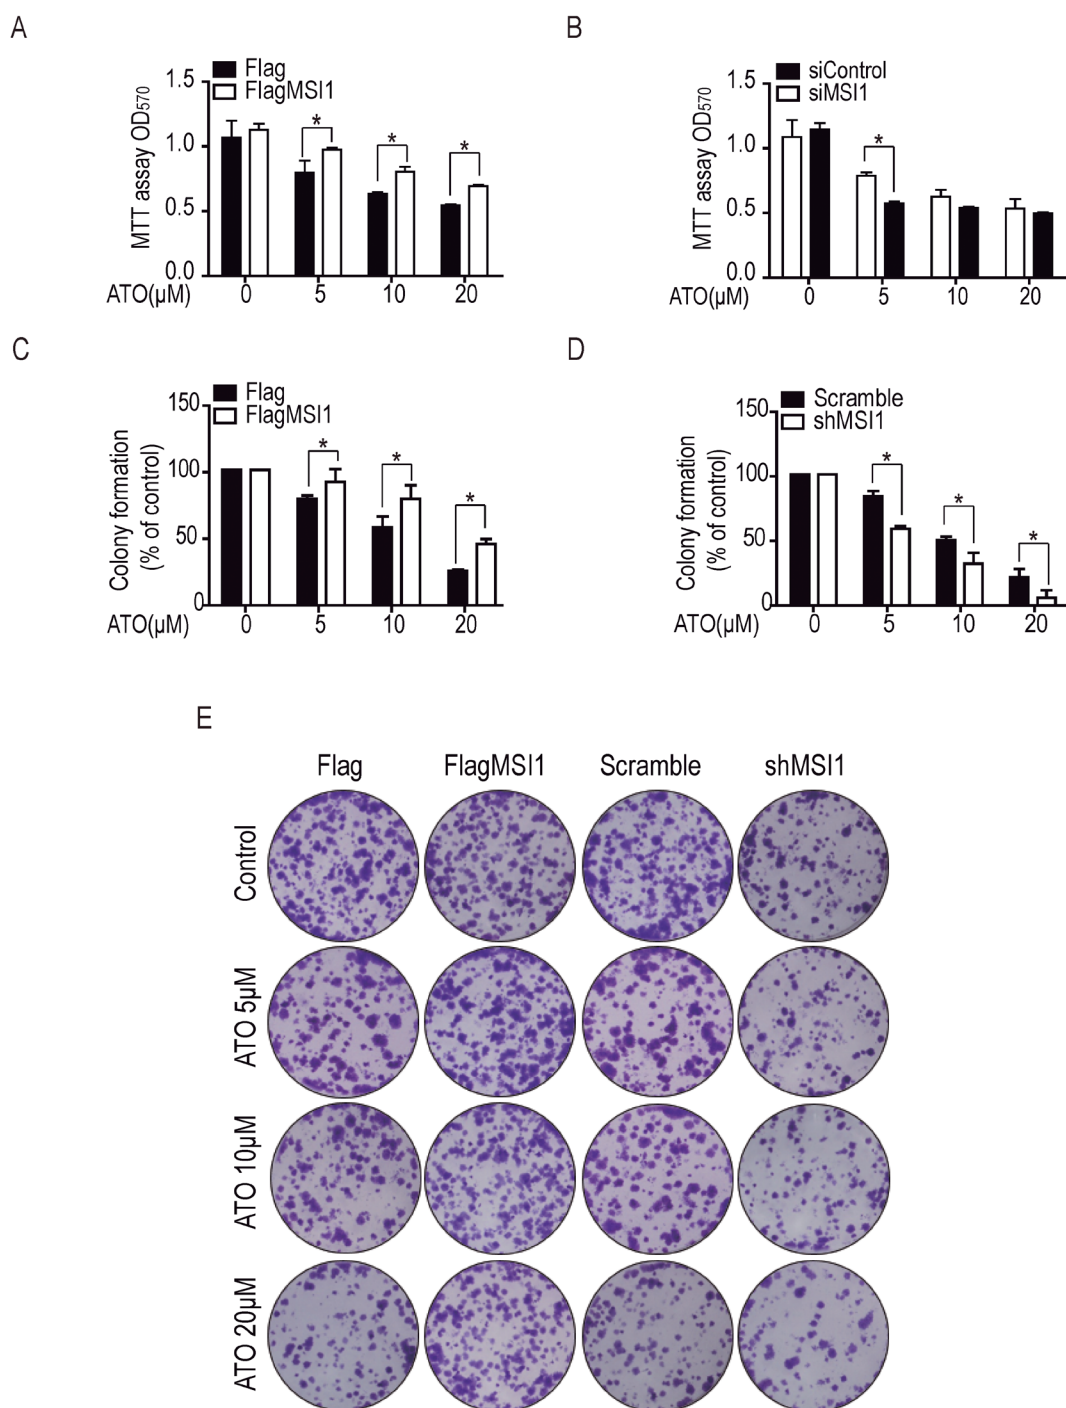

**Supplementary Figure S1: Musashi-1 enhanced cell viability and colony formation under ATO treatment in GBM cells.** A-B. Cells were treated with a dose-course ATO (from 0 to 20  $\mu$ M) for 16 hours, and the cell viability was determined by MTT assay. C-D. Cells were treated with a dose-course ATO for 16 hours, followed by a colony formation assay incubated for 10 days allowing the survived cells forming colonies. Data represent the mean  $\pm$  S.D. of three independent experiments performed in triplicate. \*  $P < 0.05$  vs control cells. E. The formation of colonies in C and D was photographed.

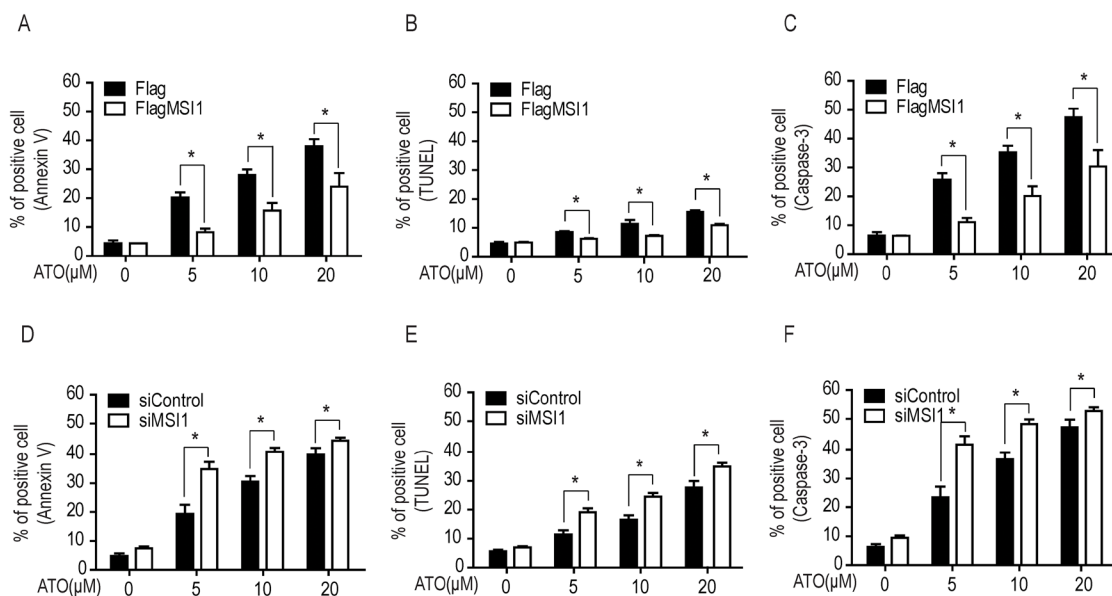

**Supplementary Figure S2: Musashi-1 mitigated ATO-induced apoptosis in GBM cells.** MSI-overexpressed (A-C) and knockdown (B-F) cells were treated by a dose-course of ATO for 16 hours. The apoptotic cells were identified by the staining of Annexin V (A, D), TUNEL assay (B, E), and activated caspase-3 (C, F), and quantified by flow cytometer. Data represent the mean  $\pm$  S.D. of three independent experiments performed in triplicate. \*  $P < 0.05$  vs control cells.

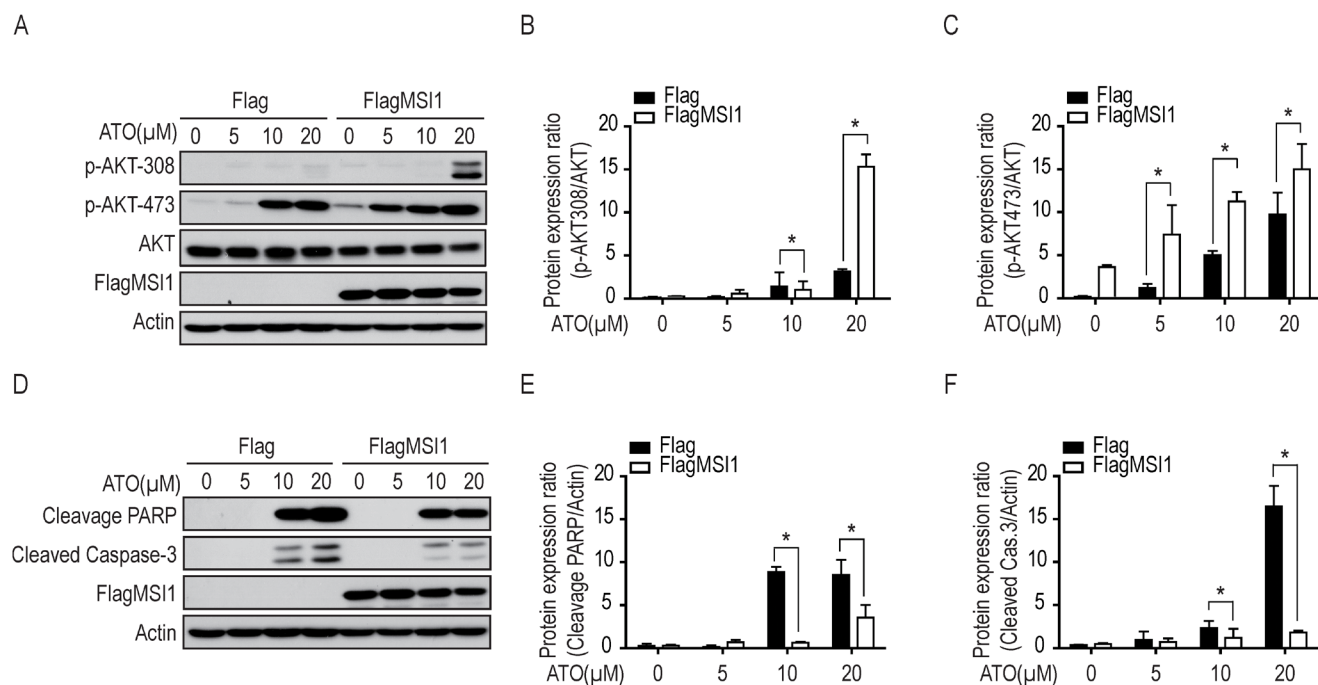

**Supplementary Figure S3: Musashi-1 enhanced AKT phosphorylation and reduced the levels of cleaved-caspase-3 and cleavage-PARP under DDP treatment.** A-C. 05MG-FlagMSI1 and 05MG-Flag cells were treated with different concentration of ATO for 16 hours. Total lysates were analyzed by Western blot to assess the level of phosphorylated and total AKT. **B.** Relative ratio of p-AKT308/AKT was quantified and presented in the bar chart. **C.** Relative ratio of p-AKT473/AKT. **D.** The same experiment as described in A was performed to assess the expression level of cleaved PARP and Caspase-3. **E.** Relative ratio of cleaved-PARP/actin. **F.** Relative ratio of cleaved-Caspase-3/actin. Data represent the mean  $\pm$  S.D. of three independent experiments performed in triplicate. \* P<0.05.

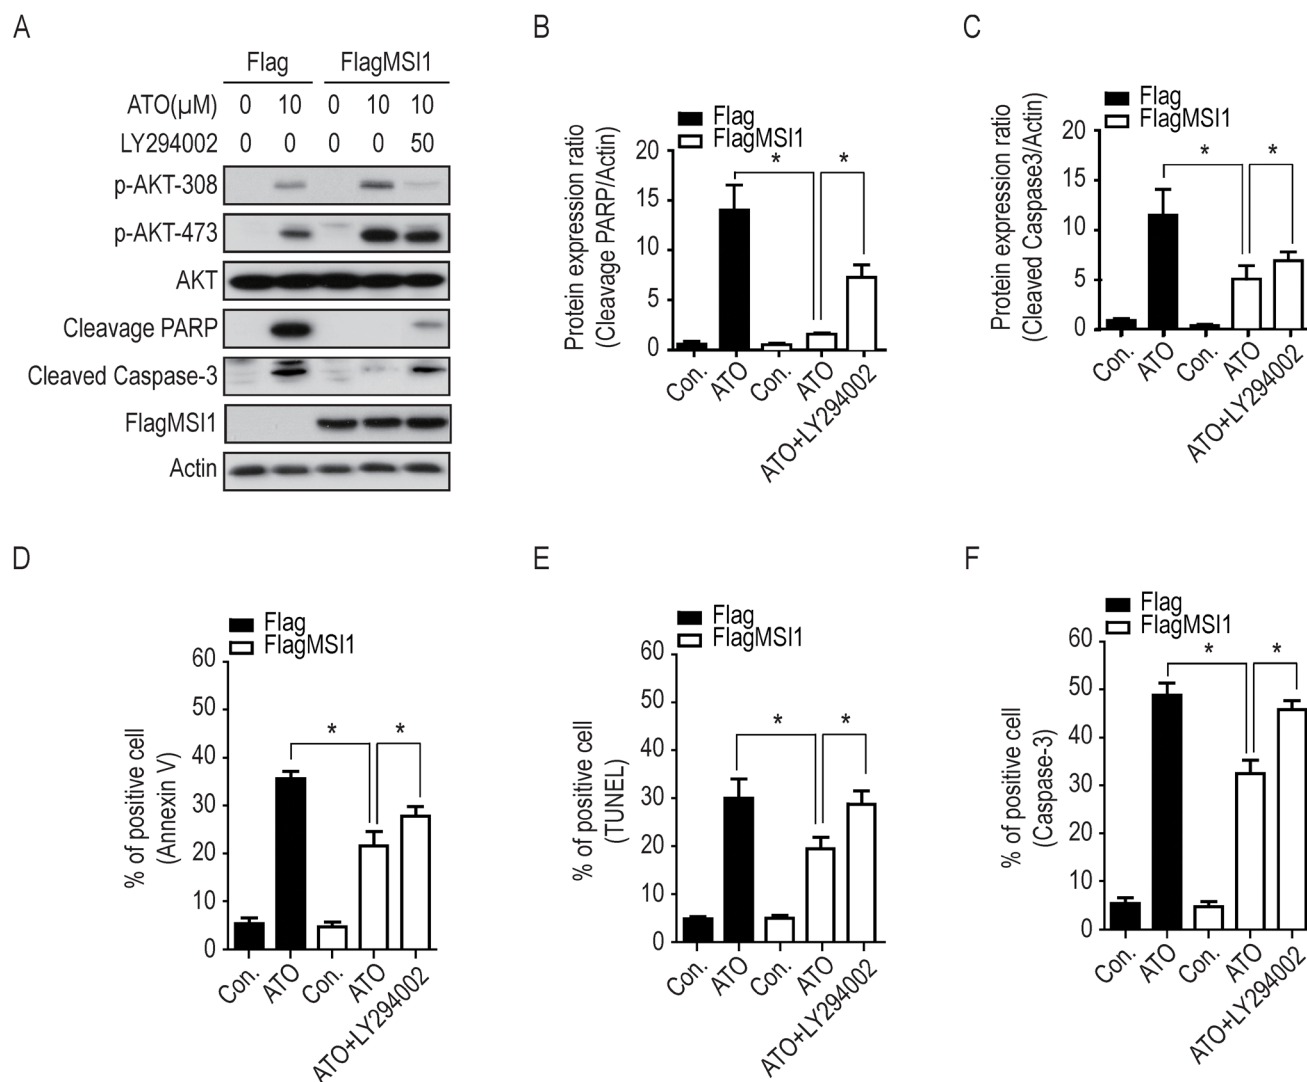

**Supplementary Figure S4: Inhibition of AKT activity blocked the suppressive effect of MSI1 on ATO-induced apoptosis.** 05MG-FlagMSI1 and 05MG-Flag cells were pretreated with 50  $\mu$ M of LY294002 or vehicle for 3 hours, followed by 10  $\mu$ M ATO treatment for additional 16 hours. **A.** Total cellular extracts were analyzed by Western blot analysis. **B.** Quantified cleaved PARP protein levels in A were standardized with actin level. **C.** Quantified cleaved Caspase-3 protein levels in A were standardized with actin level. Data represent the mean  $\pm$  S.D. of three independent experiments performed in triplicate. \*  $P < 0.05$ . **D-F.** Percentage of apoptotic cells were quantified by Flow cytometry in Annexin V (D), TUNEL (E), and Caspase-3 (F) assay. Data represent the mean  $\pm$  S.D. of three independent experiments performed in triplicate.

Supplementary Table S1: List of primers used in quantitative real-time PCR

| Gene Name | Forward               | Reverse               |
|-----------|-----------------------|-----------------------|
| IL-6      | GAAGTCCTTCTCCACAAGCG  | CTGAAGAGGTGAGTGGCTGTC |
| IL-7      | AACTGCACTGGCCAGGTAAAA | GGATGCAGCTAAAGTTCGTGT |
| IL-17     | CCTTGGAATCTCCACCGCAA  | GACAATCGGGGTGACACAGG  |
| BICR3     | CCAAGTGGTTTCCAAGGTGTG | TAAAGCCCATTTCCACGGCA  |
| CXCR4     | GGTACCATGGAGGGGATCAG  | GGTGCAGCCTGTACTTGTCC  |
| CXCL3     | TGTGAATGTAAGGTCCCCCG  | ACCCTGCAGGAAGTGTCAAT  |
